# Supplementary material for: Identification of Pyrvinium, an Anthelmintic Drug, as a Novel Anti-Adipogenic Compound Based on the Gene Expression Microarray and Connectivity Map
Source: PubMed Central journal article supplement (PMC6650900; doi:10.3390/molecules24132391), 2019-06-28
Supplement: molecules-24-02391-s001.pdf [file molecules-24-02391-s001.pdf]

## Supplementary materials

# Identification of Pyrvinium, an Anthelmintic Drug, as a Novel Anti-Adipogenic Compound Based on the Gene Expression Microarray and Connectivity Map

Zonggui Wang <sup>1</sup>, Zhong Dai <sup>2,3</sup>, Zhicong Luo <sup>2,3</sup> and Changqing Zuo <sup>2,3,\*</sup>

<sup>1</sup> Department of Biochemistry and Molecular Biology, Guangdong Medical University, Dongguan 523808, Guangdong, China

<sup>2</sup> Guangdong Key Laboratory for Research and Development of Natural Drugs, Zhanjiang 524023, Guangdong, China

<sup>3</sup> School of Pharmacy, Guangdong Medical University, Dongguan, Guangdong 523808, China

\* Correspondence: zuochangqing@gdmu.edu.cn; Tel.: +86-769-22896551



**Table S1.** The up-regulated expression genes in C3H10T1/2 and 3T3-L1 cells during adipogenic differentiation.

| Gene symbol/name |              |               |               |               |               |               |               |               |               |               |
|------------------|--------------|---------------|---------------|---------------|---------------|---------------|---------------|---------------|---------------|---------------|
| Abca1            | Abhd5        | Acadv1        | Aco2          | Acox1         | Acsf2         | Acsf3         | Acs1          | Acss3         | Adh1          | Adhfe1        |
| Adig             | Adipoq       | Adrb2         | Adrb3         | Agpat2        | Agt           | Aifm2         | Akr7a5        | Aldh1a1       | Aldh1a7       | Aldh3b2       |
| Alpl             | Amacr        | Angptl6       | Ankrd37       | Ano2          | Anxa8         | Apex2         | Apmap         | Apol6         | Arhgap27      | Armc12        |
| Arxes1           | Arxes2       | Atp1a4        | Atp2b4        | Atp5g1        | B3gnt6        | BB287469      | Bckdhb        | Bnip3         | Car5b         | Ccdc103       |
| Ccdc125          | Ccdc69       | Cd160         | Ceacam15      | Ces1d         | Ces1f         | Cfd           | Cidec         | Cldn15        | Cluh          | Clybl         |
| Cma1             | Cmb1         | Cox6a2        | Cox7a1        | Cpa1          | Crls1         | Cxcl13        | Cyc1          | Cycs          | Cyp2b10       | Cyp2c44       |
| Cyp2c70          | Cyp2f2       | Defb43        | Dgat1         | Dgat2         | Dhrs3         | Dnajb9        | Ear1          | Ear10         | Ear2          | Ear3          |
| Ear6             | Ear7         | Echdc1        | Echs1         | Ehf           | Ehhadh        | Emc9          | Endog         | Eppk1         | Ero1l         | Fabp4         |
| Fabp5            | Fam13a       | Fam178b       | Fam195a       | Fam213a       | Fam214a       | Fam83a        | Fam89a        | Fgf21         | Fitm2         | Fkbp5         |
| Folh1            | Fsd2         | G0s2          | Gbe1          | Gbgt1         | Gchfr         | Gdf5          | Ghitm         | Glul          | Gm2016        | Gm2022        |
| Gm4794           | Gm8300       | Gnpat         | Gpcpd1        | Gpd1          | Gpr81         | Gpt           | Gpt2          | Gsdmc4        | Gys1          | Gys2          |
| Hibadh           | Hibch        | Higd1a        | Hist1h1d      | Hist1h4h      | Hk2           | Hmha1         | Hp            | Hpdl          | Hsd11b1       | Idh3a         |
| Ifngr1           | Itgae        | Itpk1         | Ivns1abp      | Kbtbd11       | Kbtbd13       | Kcnk15        | Kcnk3         | Klb           | Krt36         | Krt79         |
| Larp1b           | Lcn2         | Lin52         | Lipe          | Lrrc39        | Map7d2        | Mapk6         | Mboat4        | Mc5r          | Mcam          | Mdh1          |
| Mettl7b          | Mgst3        | Mical3        | Mpp3          | Mrap          | Mreg          | Msra          | Mthfd2        | Mxi1          | Myc           | Naaa          |
| Nampt            | Napsa        | Nat1          | Niacr1        | Nr1h3         | Nrg4          | Nudt12        | Nudt17        | Nupr1         | Olr1          | Orm1          |
| Orm2             | Pank3        | Pcx           | Pde3b         | Pdss1         | Pex11a        | Pfkfb3        | Pfk1          | Phospho1      | Pim3          | Pkp1          |
| Pla2g12a         | Pla2g16      | Plin1         | Pnpla2        | Por           | Ppa1          | Ppargc1b      | Ppp2r1b       | Prg4          | Prrt4         | Psen2         |
| Psma1            | Pxmp2        | Rab15         | Rbmx12        | Rcl1          | Rdh19         | Retn          | Retnla        | Rgcc          | Rgn           | Rprml         |
| Rpusd3           | Scarb1       | Scp2          | Sdr9c7        | Selenbp1      | Selenbp2      | Serpina3c     | Serpina3k     | Sfxn1         | Sh2b2         | Sik2          |
| Slc13a4          | Slc16a10     | Slc1a5        | Slc22a20      | Slc25a10      | Slc25a19      | Slc25a34      | Slc2a4        | Slc36a2       | Slc5a6        | Smim5         |
| Smim6            | Sorbs1       | Sort1         | Srms          | Strip2        | Syde2         | Syne1         | Taldo1        | Tead4         | Tgm2          | Thrsp         |
| Tmem116          | Tmem216      | Tmem45b       | Trim9         | Trpc1         | Tsc22d3       | Tst           | Tusc5         | Txlng         | Ubqln1        | Ucp3          |
| Ufsp1            | Usp49        | Vwa8          | Wnk4          | Zfp36l3       | 1600014C23Rik | 1700001J03Rik | 1700093K21Rik | 2010003K11Rik | 2610020H08Rik | 2610528A11Rik |
| 3010026O09Rik    | 4632428N05Ri | 5730508B09Rik | 9430023L20Rik | A530016L24Rik |               |               |               |               |               |               |





**Table S4.** The transformed Affymetrix probesets from the down-regulated expression genes list.

| Affymetrix U133A probesets |             |             |             |             |             |             |             |             |             |             |
|----------------------------|-------------|-------------|-------------|-------------|-------------|-------------|-------------|-------------|-------------|-------------|
| 200974_at                  | 201058_s_at | 201107_s_at | 201108_s_at | 201109_s_at | 201110_s_at | 201278_at   | 201279_s_at | 201280_s_at | 201416_at   | 201417_at   |
| 201418_s_at                | 201605_x_at | 201645_at   | 201860_s_at | 201893_x_at | 202052_s_at | 202191_s_at | 202192_s_at | 202262_x_at | 202273_at   | 202291_s_at |
| 202351_at                  | 202820_at   | 202863_at   | 202864_s_at | 202949_s_at | 203666_at   | 203684_s_at | 203685_at   | 203729_at   | 203873_at   | 203874_s_at |
| 203875_at                  | 203889_at   | 203921_at   | 204285_s_at | 204286_s_at | 204337_at   | 204338_s_at | 204339_s_at | 204358_s_at | 204359_at   | 204462_s_at |
| 204489_s_at                | 204490_s_at | 204501_at   | 204533_at   | 204802_at   | 204803_s_at | 204846_at   | 204896_s_at | 204897_at   | 204924_at   | 205185_at   |
| 205399_at                  | 205422_s_at | 205440_s_at | 205483_s_at | 205534_at   | 205535_s_at | 205611_at   | 205635_at   | 205717_x_at | 205782_at   | 205991_s_at |
| 206029_at                  | 206078_at   | 206115_at   | 206116_s_at | 206117_at   | 206157_at   | 206237_s_at | 206343_s_at | 206426_at   | 206427_s_at | 206501_x_at |
| 206617_s_at                | 206673_at   | 206932_at   | 207004_at   | 207005_s_at | 207053_at   | 207082_at   | 207172_s_at | 207173_x_at | 207191_s_at | 207248_at   |
| 207293_s_at                | 207294_at   | 207369_at   | 207374_at   | 207704_s_at | 207776_s_at | 207823_s_at | 207938_at   | 208127_s_at | 208189_s_at | 208195_at   |
| 208230_s_at                | 208231_at   | 208232_x_at | 208241_at   | 208408_at   | 208475_at   | 208476_s_at | 208782_at   | 209079_x_at | 209108_at   | 209109_s_at |
| 209306_s_at                | 209307_at   | 209335_at   | 209369_at   | 209465_x_at | 209466_x_at | 209561_at   | 209647_s_at | 209648_x_at | 209651_at   | 209687_at   |
| 209716_at                  | 209835_x_at | 209897_s_at | 209901_x_at | 209955_s_at | 209960_at   | 209961_s_at | 210218_s_at | 210219_at   | 210273_at   | 210368_at   |
| 210369_at                  | 210517_s_at | 210557_x_at | 210755_at   | 210757_x_at | 210804_x_at | 210872_x_at | 210916_s_at | 210941_at   | 210985_s_at | 210986_s_at |
| 210987_x_at                | 210997_at   | 210998_s_at | 211066_x_at | 211067_s_at | 211103_at   | 211104_s_at | 211737_x_at | 211805_s_at | 211813_x_at | 211839_s_at |
| 211896_s_at                | 212014_x_at | 212063_at   | 212509_s_at | 212670_at   | 213095_x_at | 213665_at   | 213668_s_at | 213714_at   | 213866_at   | 214059_at   |
| 214321_at                  | 214453_s_at | 214587_at   | 214635_at   | 214909_s_at | 214927_at   | 215051_x_at | 215294_s_at | 215303_at   | 215365_at   | 215389_s_at |
| 215537_x_at                | 215775_at   | 215787_at   | 215836_s_at | 216005_at   | 216056_at   | 216269_s_at | 216598_s_at | 216724_at   | 216725_at   | 217053_x_at |
| 217061_s_at                | 217502_at   | 217523_at   | 217892_s_at | 217996_at   | 217997_at   | 217998_at   | 217999_s_at | 218000_s_at | 218468_s_at | 218469_at   |
| 218730_s_at                | 218986_s_at | 219014_at   | 219049_at   | 219179_at   | 219250_s_at | 219427_at   | 219684_at   | 219935_at   | 219950_s_at | 220040_x_at |
| 220194_at                  | 220327_at   | 220613_s_at | 220663_at   | 220866_at   | 221152_at   | 221447_s_at | 221910_at   | 221911_at   | 222321_at   | 33197_at    |

**Table S5.** Primers used for RT-qPCR.

| <b>Gene name</b> | <b>Forward primer (5'--3')</b> | <b>Reverse primer (5'--3')</b> |
|------------------|--------------------------------|--------------------------------|
| aP2              | GATGCCTTTGTGGGAACCTG           | CAGTTTGAAGGAAATCTCGGT          |
| Adipsin          | CTGAACCCTACAAGCGATGG           | ACCCAACGAGGCATTCTG             |
| Hes1             | TGCCAGCTGATATAATGGAGAA         | CCATGATAGGCTTTGATGACTT         |
| Hey1             | CATGAAGAGAGCTCACCCAGA          | GAACACAGCGCCGAACTCAA           |
| Bnip3            | TGGATGCCCAGCATGAATCTG          | CTGTGGCTGTCTATTTTCAGCTC        |
| Fkbp5            | TATGCTTATGGCTCGGCTGG           | GAGTATCCCTCGCCTTTCCG           |
| Pank3            | GGTGCTGAGTGCTACAGGAG           | GCAAGCCCTTTACAAGGCAG           |
| Sox4             | GGACAGCGACAAGATTCCGT           | TGCCCGACTTCACCTTCTTTC          |
| 36B4             | GCTTCATTGTGGGAGCAGAC           | ATGGTGTTCTTGCCCATCAG           |
